# Supplementary material
Source: PubMed Central journal article supplement (PMC7780295)
Supplement: 93823-2020.08.18.20177303-1.pdf [file 93823-2020.08.18.20177303-1.pdf]

**a**

Spike

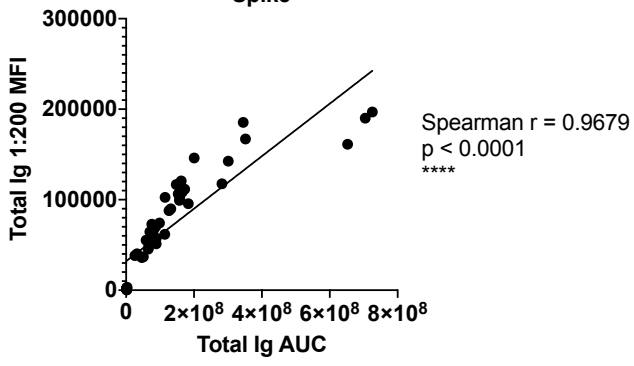**b**

RBD

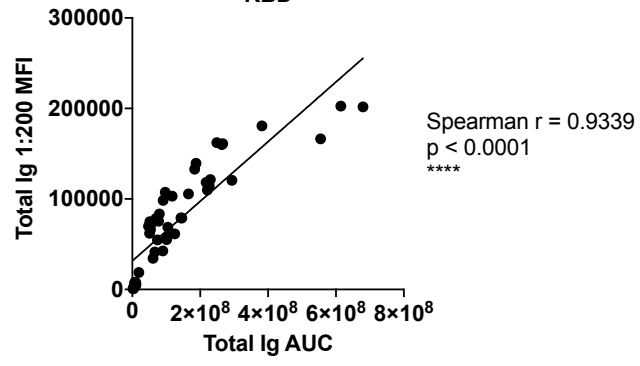

**Supplementary Fig. 1.** Spearman correlations of the area under the curves (AUCs) of (a) spike- or (b) RBD-specific total Ig versus total Ig MFI values at a 1:200 dilution.

**a****Spike**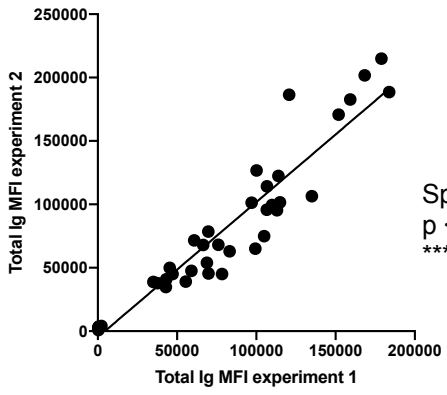

Spearman  $r = 0.9638$   
 $p < 0.0001$   
\*\*\*\*

**b****RBD**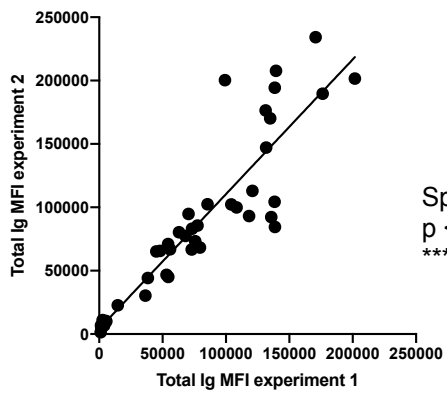

Spearman  $r = 0.9439$   
 $p < 0.0001$   
\*\*\*\*

**Supplementary Fig. 2.** Spearman correlations between (a) spike-specific or (b) RBD-specific total Ig MFI values from two independent experiments to show the degree of assay reproducibility.

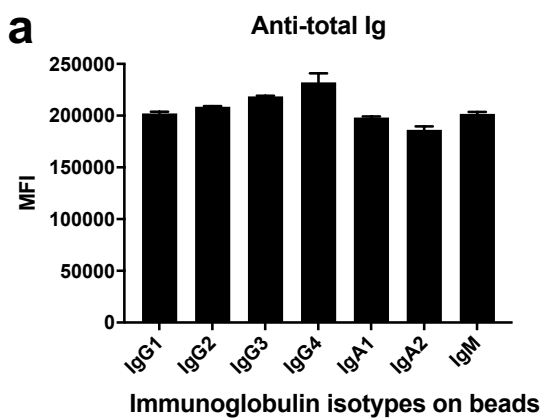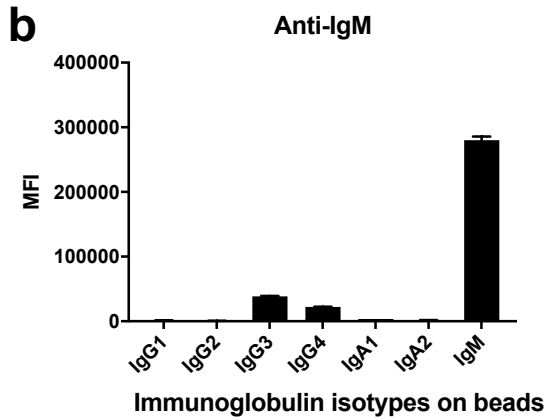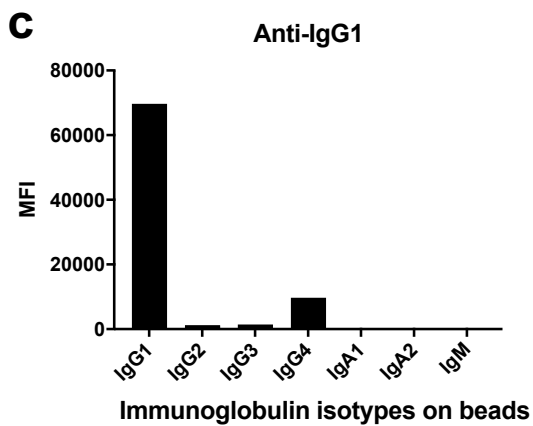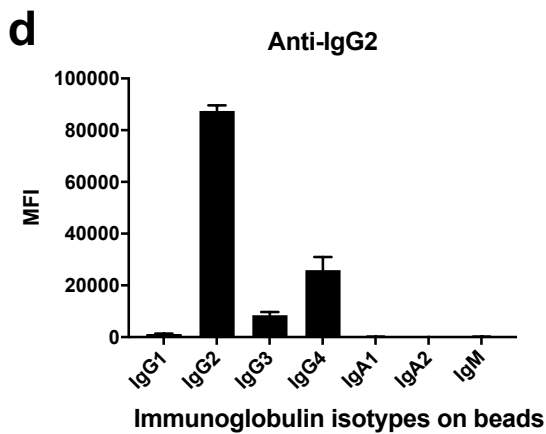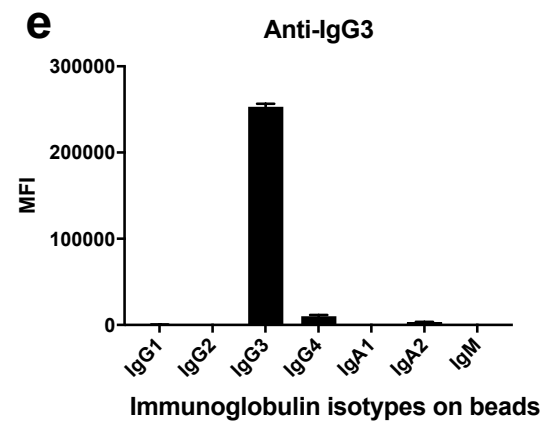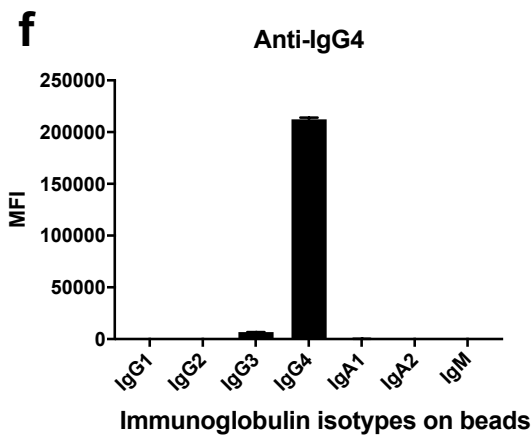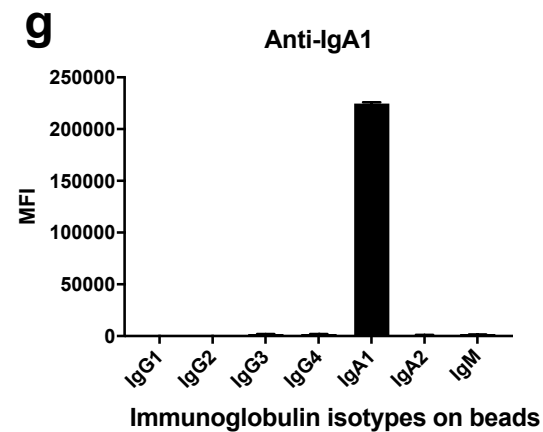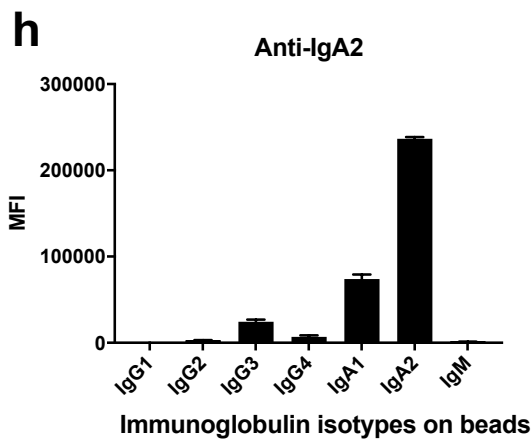

**Supplementary Fig. 3.** Isotyping validation was performed by coating Luminex beads with IgG1, IgG2, IgG3, IgG4, IgA1, IgA2, and IgM myeloma proteins and detecting each specifically with eight different secondary Abs against (a) total Ig, (b) IgM, (c) IgG1, (d) IgG2, (e) IgG3, (f) IgG4, (g) IgA1 and (h) IgA2. The data are shown as mean MFI + SD of duplicate.

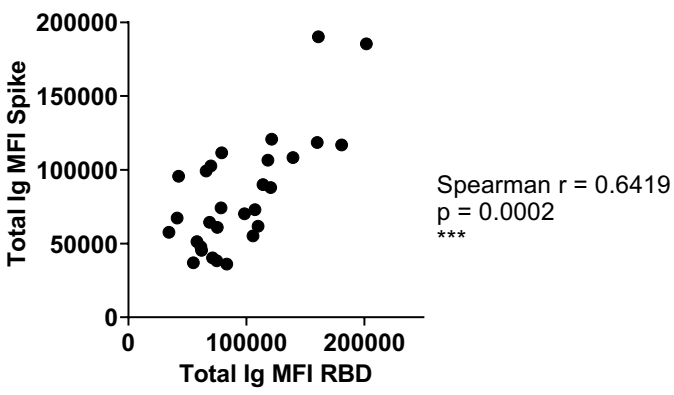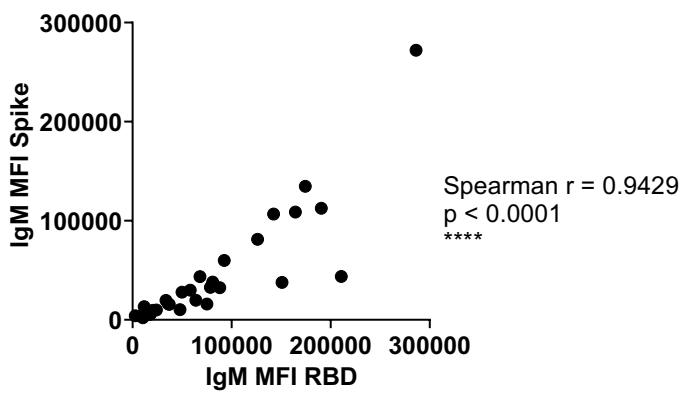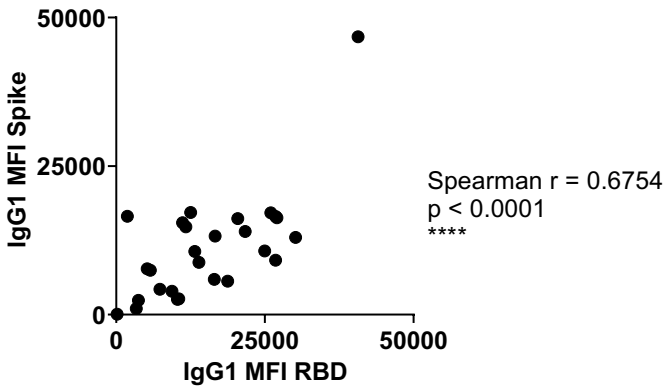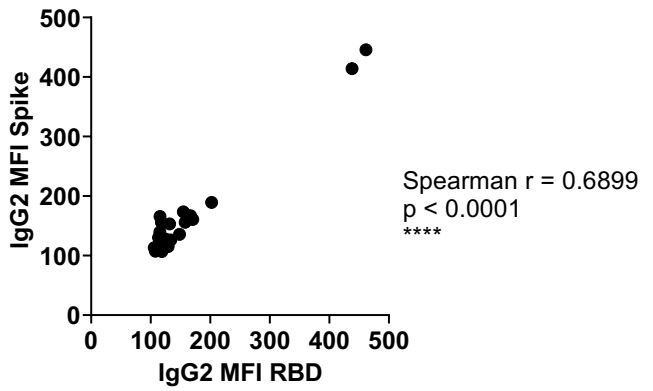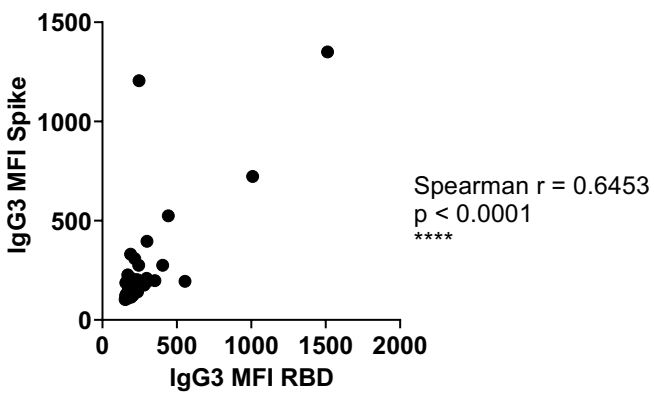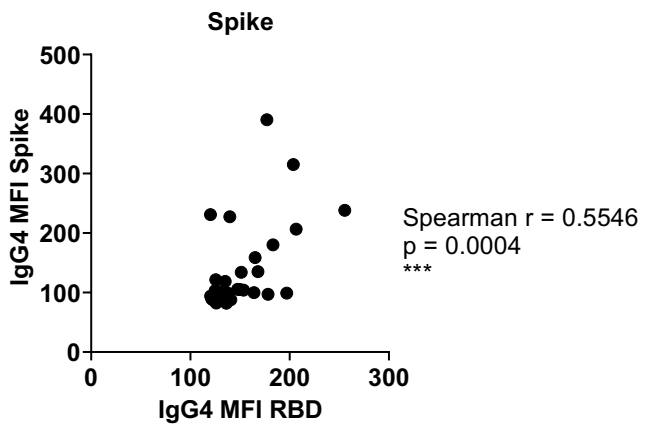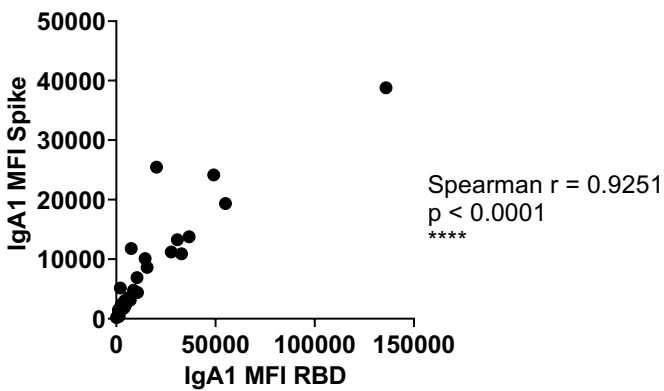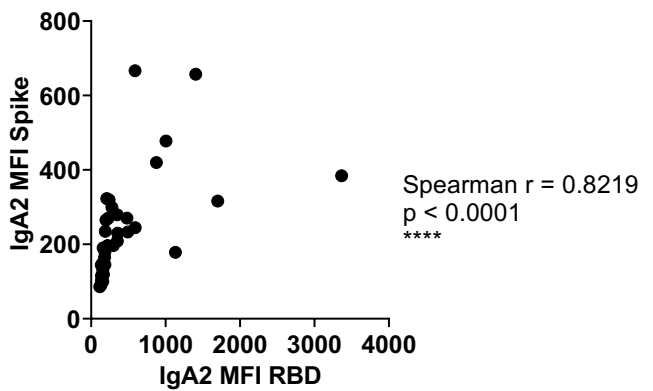

**Supplementary Fig. 4.** Spearman correlations between spike-specific versus RBD-specific total Ig, IgM, IgG1, IgG2, IgG3, IgG4, IgA1, or IgA2 MFI values.



**a**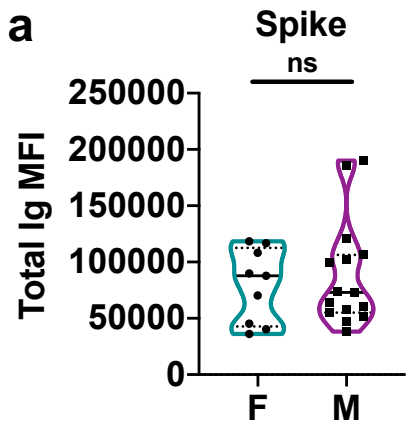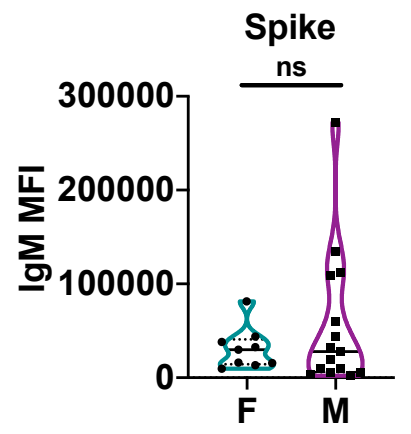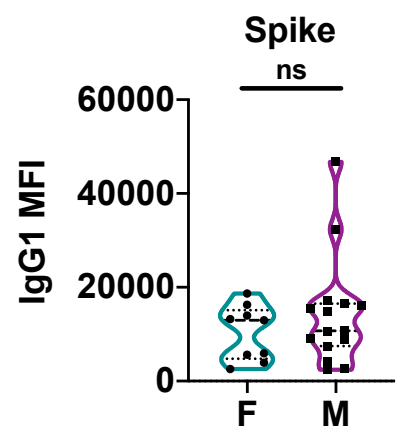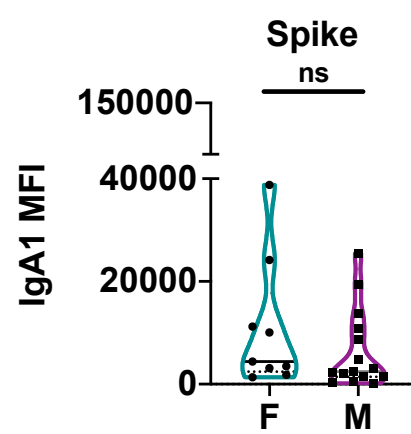**b**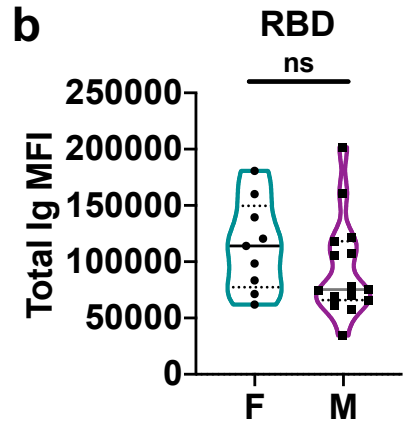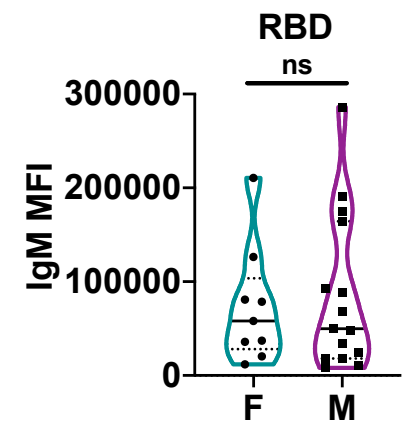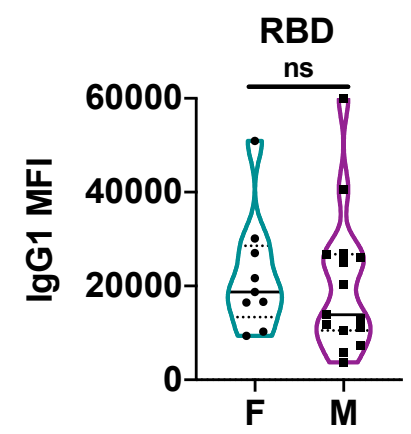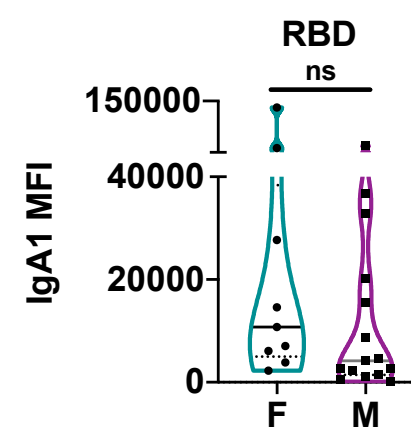

**Supplementary Fig. 5.** Violin plots of (a) spike-specific or (b) RBD-specific total Ig, IgM, IgG1, and IgA1 levels from nine COVID-19 convalescent female (F) and 15 male (M) subjects. The statistical significance was determined by a two-tailed Mann-Whitney test (ns: non-significant:  $p > 0.05$ ).

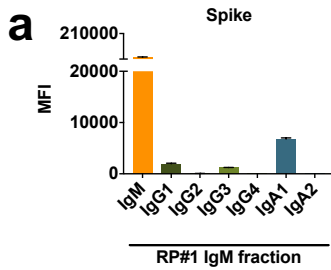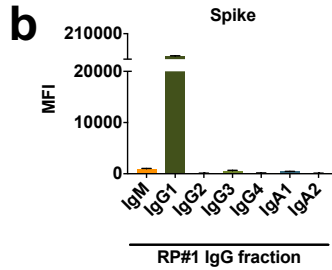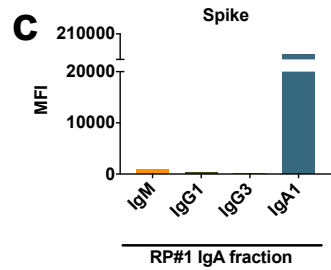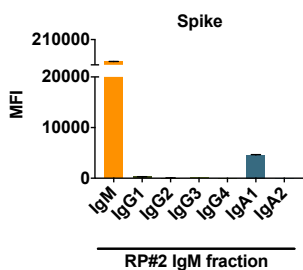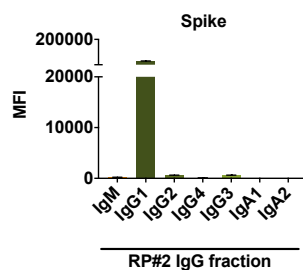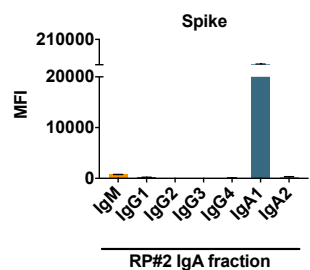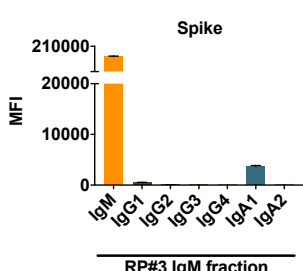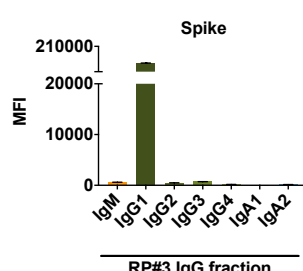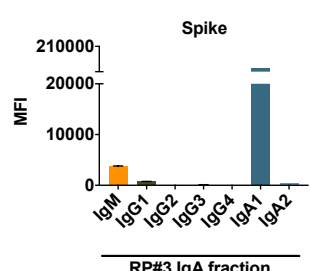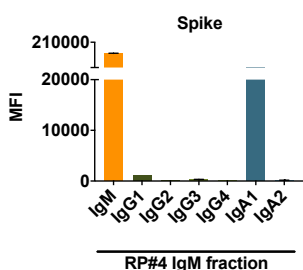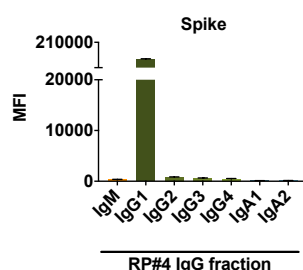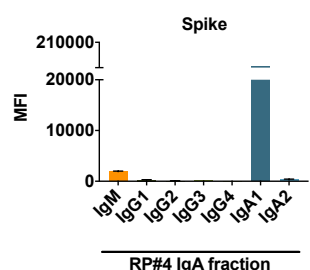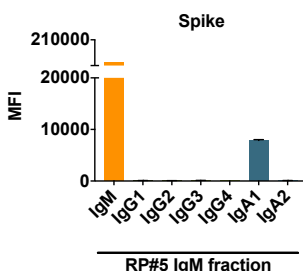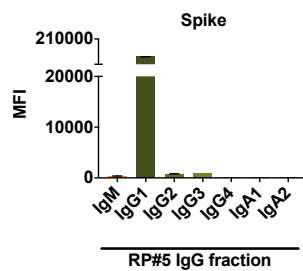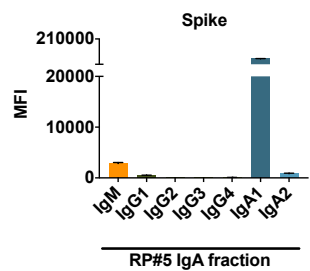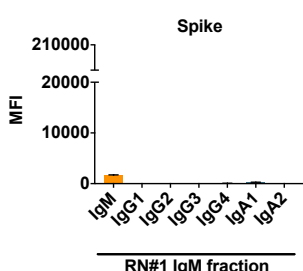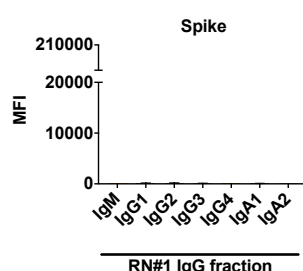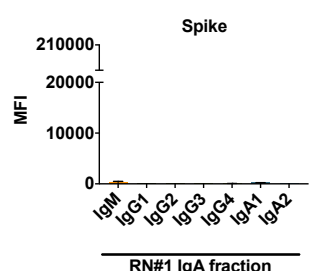

**Supplementary Fig. 6.** Enrichment of spike-specific IgM (a), IgG (b), and IgA in purified fractions from RP#1-5 and RN#1. Each fraction was measured for the presence of IgM, IgG1, IgG2, IgG3, IgG4, IgA1, and IgA2 Abs using the isotyping method validated in Supplementary Fig. 3.
