# Supplementary material
Source: PubMed Central journal article supplement (PMC7780295)
Supplement: media-2.pdf [file media-2.pdf]

Supplementary Table 1. Summary of COVID-19-positive and -negative samples examined in the study.

|                                   | Specimen identifier | Biospecimen | Age range | Sex     | Transfused to patient? | Date of plasma donation       | Days between sera testing and plasma donation | SARS-CoV-2 PCR result | Symptoms suggestive of COVID-19 | Days post symptom onset and serum collection | COVID-19 severity |
|-----------------------------------|---------------------|-------------|-----------|---------|------------------------|-------------------------------|-----------------------------------------------|-----------------------|---------------------------------|----------------------------------------------|-------------------|
| Individuals with acute infection  | P#1a                | serum       | unknown   | unknown | no                     | n/a                           | n/a                                           | positive              | yes                             | 8                                            | severe            |
|                                   | P#1b                | serum       | unknown   | unknown | no                     | n/a                           | n/a                                           | positive              | yes                             | 11                                           | severe            |
|                                   | P#1c                | serum       | unknown   | unknown | no                     | n/a                           | n/a                                           | positive              | yes                             | 15                                           | severe            |
|                                   | P#2a                | serum       | unknown   | unknown | no                     | n/a                           | n/a                                           | positive              | yes                             | 7                                            | severe            |
|                                   | P#2b                | serum       | unknown   | unknown | no                     | n/a                           | n/a                                           | positive              | yes                             | 10                                           | severe            |
|                                   | P#3                 | serum       | unknown   | unknown | no                     | n/a                           | n/a                                           | positive              | yes                             | 22                                           | mild              |
|                                   | P#4                 | serum       | unknown   | unknown | no                     | n/a                           | n/a                                           | inconclusive          | yes                             | 21                                           | mild              |
| COVID-19-convalescent individuals | P#5                 | serum       | unknown   | unknown | no                     | n/a                           | n/a                                           | positive              | unknown                         | unknown                                      | unknown           |
|                                   | P#6                 | serum       | unknown   | unknown | no                     | n/a                           | n/a                                           | positive              | unknown                         | unknown                                      | unknown           |
|                                   | P#7                 | serum       | unknown   | unknown | no                     | n/a                           | n/a                                           | positive              | unknown                         | unknown                                      | unknown           |
|                                   | P#8                 | serum       | unknown   | unknown | no                     | n/a                           | n/a                                           | positive              | unknown                         | unknown                                      | unknown           |
|                                   | TF#1                | plasma      | 50-55     | F       | yes                    | 26/03/2020<br>-<br>07/04/2020 | 2                                             | unknown               | unknown                         | unknown                                      | unknown           |
|                                   | TF#2                | plasma      | 30-35     | M       | yes                    |                               | 4                                             | unknown               | unknown                         | unknown                                      | unknown           |
|                                   | TF#3                | plasma      | 25-30     | M       | yes                    |                               | 4                                             | unknown               | unknown                         | unknown                                      | unknown           |
|                                   | TF#4                | plasma      | 30-35     | F       | yes                    |                               | 3                                             | unknown               | unknown                         | unknown                                      | unknown           |
|                                   | TF#5                | plasma      | 45-50     | M       | yes                    |                               | 6                                             | unknown               | unknown                         | unknown                                      | unknown           |
|                                   | TF#6                | plasma      | 15-20     | F       | yes                    |                               | 3                                             | unknown               | unknown                         | unknown                                      | unknown           |
|                                   | TF#7                | plasma      | 35-40     | F       | yes                    |                               | 2                                             | unknown               | unknown                         | unknown                                      | unknown           |
|                                   | TF#8                | plasma      | 50-55     | M       | yes                    |                               | 1                                             | unknown               | unknown                         | unknown                                      | unknown           |
|                                   | TF#9                | plasma      | 35-40     | F       | yes                    |                               | 5                                             | unknown               | unknown                         | unknown                                      | unknown           |
|                                   | TF#10               | plasma      | 35-40     | M       | yes                    |                               | 7                                             | unknown               | unknown                         | unknown                                      | unknown           |
|                                   | TF#11               | plasma      | 50-55     | M       | yes                    |                               | 6                                             | unknown               | unknown                         | unknown                                      | unknown           |
|                                   | TF#12               | plasma      | 25-30     | F       | yes                    |                               | 4                                             | unknown               | unknown                         | unknown                                      | unknown           |
|                                   | TF#13               | plasma      | 30-35     | M       | yes                    |                               | 3                                             | unknown               | unknown                         | unknown                                      | unknown           |
|                                   | TF#14               | plasma      | 25-30     | M       | yes                    |                               | 3                                             | unknown               | unknown                         | unknown                                      | unknown           |
|                                   | TF#15               | plasma      | 35-40     | M       | yes                    |                               | 3                                             | unknown               | unknown                         | unknown                                      | unknown           |
|                                   | TF#16               | plasma      | 45-50     | M       | yes                    |                               | 3                                             | unknown               | unknown                         | unknown                                      | unknown           |
|                                   | TF#17               | plasma      | 25-30     | M       | yes                    |                               | 4                                             | unknown               | unknown                         | unknown                                      | unknown           |
|                                   | TF#18               | plasma      | 30-35     | F       | yes                    |                               | 5                                             | unknown               | unknown                         | unknown                                      | unknown           |
|                                   | TF#19               | plasma      | 30-35     | M       | yes                    |                               | 4                                             | unknown               | unknown                         | unknown                                      | unknown           |
|                                   | TF#20               | plasma      | 25-30     | F       | yes                    |                               | 3                                             | unknown               | unknown                         | unknown                                      | unknown           |
|                                   | TF#21               | plasma      | 25-30     | M       | yes                    |                               | 5                                             | unknown               | unknown                         | unknown                                      | unknown           |
| TF#22                             | plasma              | 30-35       | M         | yes     | 6                      |                               | unknown                                       | unknown               | unknown                         | unknown                                      |                   |
| TF#23                             | plasma              | 30-35       | unknown   | yes     | 6                      |                               | unknown                                       | unknown               | unknown                         | unknown                                      |                   |
| TF#24                             | plasma              | 30-35       | M         | yes     | 3                      |                               | unknown                                       | unknown               | unknown                         | unknown                                      |                   |
| TF#25                             | plasma              | 50-55       | F         | yes     | 6                      |                               | unknown                                       | unknown               | unknown                         | unknown                                      |                   |
| Pre-pandemic controls             | N#1                 | serum       | unknown   | unknown | n/a                    | n/a                           | n/a                                           | n/a                   | n/a                             | n/a                                          | n/a               |
|                                   | N#2                 | serum       | unknown   | unknown | n/a                    | n/a                           | n/a                                           | n/a                   | n/a                             | n/a                                          | n/a               |
|                                   | N#3                 | serum       | unknown   | unknown | n/a                    | n/a                           | n/a                                           | n/a                   | n/a                             | n/a                                          | n/a               |
| Contemporaneous COVID-19-negative | N#4                 | plasma      | unknown   | unknown | n/a                    | n/a                           | n/a                                           | n/a                   | n/a                             | n/a                                          | n/a               |
|                                   | N#5                 | plasma      | unknown   | unknown | n/a                    | n/a                           | n/a                                           | n/a                   | n/a                             | n/a                                          | n/a               |
|                                   | N#6                 | plasma      | unknown   | unknown | n/a                    | n/a                           | n/a                                           | n/a                   | n/a                             | n/a                                          | n/a               |
|                                   | N#7                 | plasma      | unknown   | unknown | n/a                    | n/a                           | n/a                                           | n/a                   | n/a                             | n/a                                          | n/a               |
|                                   | N#8                 | plasma      | unknown   | unknown | n/a                    | n/a                           | n/a                                           | n/a                   | n/a                             | n/a                                          | n/a               |
|                                   | N#9                 | plasma      | unknown   | unknown | n/a                    | n/a                           | n/a                                           | n/a                   | n/a                             | n/a                                          | n/a               |
|                                   | N#10                | plasma      | unknown   | unknown | n/a                    | n/a                           | n/a                                           | n/a                   | n/a                             | n/a                                          | n/a               |
|                                   | N#11                | plasma      | unknown   | unknown | n/a                    | n/a                           | n/a                                           | n/a                   | n/a                             | n/a                                          | n/a               |
|                                   | N#12                | plasma      | unknown   | unknown | n/a                    | n/a                           | n/a                                           | n/a                   | n/a                             | n/a                                          | n/a               |
|                                   | N#13                | plasma      | unknown   | unknown | n/a                    | n/a                           | n/a                                           | n/a                   | n/a                             | n/a                                          | n/a               |
| Pre-pandemic controls             | N#14                | plasma      | 60-65     | M       | n/a                    | n/a                           | n/a                                           | n/a                   | n/a                             | n/a                                          | n/a               |
|                                   | N#15                | plasma      | 65-70     | M       | n/a                    | n/a                           | n/a                                           | n/a                   | n/a                             | n/a                                          | n/a               |
|                                   | N#16                | plasma      | 50-55     | M       | n/a                    | n/a                           | n/a                                           | n/a                   | n/a                             | n/a                                          | n/a               |
|                                   | N#17                | plasma      | 65-70     | M       | n/a                    | n/a                           | n/a                                           | n/a                   | n/a                             | n/a                                          | n/a               |
|                                   | N#18                | plasma      | 65-70     | M       | n/a                    | n/a                           | n/a                                           | n/a                   | n/a                             | n/a                                          | n/a               |
|                                   | N#19                | plasma      | 60-65     | M       | n/a                    | n/a                           | n/a                                           | n/a                   | n/a                             | n/a                                          | n/a               |
|                                   | N#20                | plasma      | 65-70     | M       | n/a                    | n/a                           | n/a                                           | n/a                   | n/a                             | n/a                                          | n/a               |
|                                   | N#21                | plasma      | 50-55     | M       | n/a                    | n/a                           | n/a                                           | n/a                   | n/a                             | n/a                                          | n/a               |
|                                   | N#22                | plasma      | 55-60     | M       | n/a                    | n/a                           | n/a                                           | n/a                   | n/a                             | n/a                                          | n/a               |

F: female, M: male, n/a: not applicable.
